# Supplementary material for: Chronic obstructive pulmonary disease mortality and prevalence: the associations with smoking and poverty—a BOLD analysis
Source: PubMed Central journal article supplement (PMC3995258; doi:10.1136/thoraxjnl-2013-204460), 2013-12-18
Supplement: thoraxjnl-2013-204460-s1.pdf [file thoraxjnl-2013-204460-s1.pdf]

**Supplementary Table E1. Sampling design and participation rates by BOLD site**

| <b>Site</b>                        | <b>Sampling design</b>    | <b>N</b> | <b>Response rate(%)</b> | <b>Cooperation rate (%)</b> |
|------------------------------------|---------------------------|----------|-------------------------|-----------------------------|
| Guangzhou, China                   | Stratified random sample  | 602      | 87                      | 87                          |
| Adana, Turkey                      | Stratified cluster sample | 875      | 82                      | 85                          |
| Salzburg, Austria                  | Stratified random sample  | 1349     | 65                      | 67                          |
| Capetown, South Africa             | Cluster sample            | 896      | 63                      | 68                          |
| Reykjavik, Iceland                 | Simple random sample      | 758      | 81                      | 84                          |
| Hannover, Germany                  | Stratified random sample  | 713      | 59                      | 61                          |
| Krakow, Poland                     | Stratified random sample  | 603      | 78                      | 79                          |
| Bergen, Norway                     | Stratified random sample  | 707      | 68                      | 71                          |
| Vancouver, Canada                  | Random digit dialling     | 856      | 26                      | 51                          |
| Manila, Philippines                | Stratified cluster sample | 918      | 58                      | 58                          |
| Lexington, USA                     | Random digit dialling     | 563      | 14                      | 27                          |
| Sydney, Australia                  | Stratified random sample  | 585      | 25                      | 33                          |
| London, England                    | Stratified random sample  | 697      | 17                      | 37                          |
| Uppsala, Sweden                    | Stratified random sample  | 588      | 61                      | 63                          |
| Mumbai, India                      | Stratified cluster sample | 515      | 55                      | 66                          |
| Lisbon, Portugal                   | Stratified cluster sample | 745      | 10                      | 27                          |
| Maastricht, The Netherlands        | Stratified random sample  | 634      | 48                      | 55                          |
| Nampicuan & Talugtug , Philippines | Stratified cluster sample | 991      | 85.5                    | 86.2                        |
| Tartu, Estonia                     | Stratified random sample  | 658      | 49                      | 70                          |
| Pune, India                        | Simple random sample      | 1388     | 97                      | 97                          |
| Sousse, Tunisia                    | Stratified cluster sample | 717      | 90                      | 92                          |
| Srinagar, India                    | Stratified cluster sample | 953      | 86.9                    | 88                          |

N – Total number of responders: defined as participants who completed the core questionnaire and have post-bronchodilator spirometry

Supplementary TABLE E2: Association of National Mortality levels from COPD with logarithm of Gross National Income / capita (\$US PPP) for the 13 countries with BOLD sites (where cooperation rate was more than 60%) and with mean pack years smoked for 15 BOLD sites (where cooperation rate was more than 60%).

|                                    | Men     |               |        | Women   |               |        |
|------------------------------------|---------|---------------|--------|---------|---------------|--------|
|                                    | $\beta$ | 95% CI        | p      | $\beta$ | 95% CI        | p      |
| Age 15-59 years                    |         |               |        |         |               |        |
| Mean Pack Years (BOLD sites: N=15) | -0.45   | -1.05, 0.14   | 0.122  | -1.72   | -2.61, -0.85  | 0.001  |
| Log GNI (BOLD countries: N=13)     | -13     | -21.75, -4.25 | 0.007  | -8.29   | -13.41, -3.16 | 0.004  |
| Age > 60 years                     |         |               |        |         |               |        |
| Mean Pack Years (BOLD sites: N=15) | -11.8   | -21.3, -2.3   | 0.019  | -76.9   | -95.4, -58.3  | <0.001 |
| Log GNI (BOLD countries: N=13)     | -383    | -445, -320    | <0.001 | -301    | -372, -230    | <0.001 |

Supplementary TABLE E3. Association of prevalence of airflow obstruction (%FEV1/FVC < LLN) ,spirometric restriction (%FVC < LLN) with mean pack years smoked and Gross National Income / capita (\$US PPP) in 15 BOLD sites where cooperation rate was more than 60%.

|                                | Men     |              |         | Women   |               |         |
|--------------------------------|---------|--------------|---------|---------|---------------|---------|
|                                | $\beta$ | 95%CI        | p-value | $\beta$ | 95%CI         | p-value |
| <b>Airflow obstruction</b>     |         |              |         |         |               |         |
| Mean Pack Years                | 0.45    | 0.20, 0.71   | 0.002   | 0.66    | -0.05, 1.38   | 0.067   |
| GNI (per \$1000PPP)            | -0.01   | -0.13, 0.12  | 0.92    | 0.06    | -0.13, 0.25   | 0.514   |
| <b>Spirometric restriction</b> |         |              |         |         |               |         |
| Mean Pack Years                | -1.32   | -2.63, -0.02 | 0.048   | -3.09   | -.5.88, -0.31 | 0.032   |
| 1/GNI (per \$1000PPP)          | 134     | 110, 159     | <0.001  | 158     | 113, 204      | <0.001  |
